# Supplementary material
Source: Springer Nature journal article supplement (https://www.springermedizin.de/resource/supplementary/12891_2009_682_MOESM2_ESM.pdf/9506172)
Supplement: MOESM2 [file 9506172]

**Study group includes N=180 patients with hip or knee osteoarthritis, randomly assigned into intervention groups**

**Exclusion criteria:  
All patients with contraindications for conventional physiotherapy or hydrotherapy**

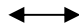

**Hydrotherapy  
N= 60 patients**

**Physiotherapy  
N= 60 patients**

**Hydro- and Physiotherapy  
N = 60 patients**

**Completed questionnaire at admission examination/baseline:**  
**Patient questionnaire:** SF-36, AIMS2-SF, Lequesne knee and hip questionnaire, EQ5D  
**Physician documentation:** *Timed up and go, VAS, Range-of-motion affected joint*  
**Issue patient journal**

**Repeat questionnaire completion at final medical examination after 2 weeks:**  
**Patient questionnaire:** SF-36, AIMS2-SF, Lequesne knee and hip questionnaire, EQ5D  
**Physician documentation:** *Timed up and go, VAS, Range-of-motion affected joint*  
**Issue patient journal**

**Telephone interview 10 weeks after release from clinic:  
SF-36, AIMS2-SF, Lequesne knee or hip questionnaire**
